# Supplementary material
Source: PubMed Central journal article supplement (PMC3077701)
Supplement: mmc1.pdf [file mmc1.pdf]

# Supporting Material: Active generation and propagation of $\text{Ca}^{2+}$ signals within tunneling membrane nanotubes

Ian F. Smith<sup>1</sup> Jianwei Shuai<sup>3</sup> & Ian Parker<sup>1,2</sup>

<sup>1</sup>Neurobiology and Behavior, <sup>2</sup> Physiology & Biophysics, University of California, Irvine, CA, 92697, USA. <sup>3</sup> Department of Physics, Xiamen University, Xiamen, China.

## METHODS

**CELL CULTURE:** Human neuroblastoma SH-SY5Y cells were cultured in a mixture of Ham's F12 medium and Eagle's minimal essential medium (1:1 mixture), supplemented with 10% (v/v) fetal calf serum and 1% nonessential amino acids. Cells were incubated at 37 °C in a humidified incubator gassed with 95% air and 5% CO<sub>2</sub>, passaged every 7 days and used for up to 20 passages. Cells were harvested in phosphate-buffered saline (PBS) without Ca<sup>2+</sup> or Mg<sup>2+</sup> and sub-cultured on glass coverslips at a seeding density of 3×10<sup>4</sup> cells/ml for 4 days before use. HEK cells were cultured in a similar manner except for use of DMEM supplemented with 10% (v/v) fetal calf serum as the culture medium. Prior to imaging, cells were incubated at room temperature in HEPES-buffered saline (HBS - composition in mM; NaCl 135, KCl 5, MgCl<sub>2</sub> 1.2, CaCl<sub>2</sub> 2.5, HEPES 5, and glucose 10) containing 1 μM ci-IP<sub>3</sub>/PM for 45 mins, after which 1 μM fluo-4AM was added to the loading solution for a further 45 min before washing and allowing at least 30 mins for deesterification. A further 60 min incubation with 5 μM EGTA-AM was performed for experiments studying localized Ca<sup>2+</sup> signals within TNTs (Figs 2A,B & C), but was omitted for experiments on cell-cell communication of Ca<sup>2+</sup> signals (Figs. 2D & 3 and Supplemental Movies 2, 3 & 4)

**CALCIUM IMAGING:** Imaging of changes in [Ca<sup>2+</sup>]<sub>i</sub> was accomplished using a home-built microscope system that was used in wide-field epifluorescence mode. The system was based around an Olympus IX 70 microscope equipped with an Olympus 60x oil objective (N.A. 1.45). Excitation light from a solid-state 488 nm laser (Coherent Sapphire) was reflected by a dichroic mirror and brought to a focus at the rear focal plane of the objective. An adjustable rectangular aperture placed at a conjugate image plane in the excitation path restricted illumination to the imaging field of the camera, and the aperture was overfilled by collimated laser light emerging from a 10x beam expander to provide Koehler illumination. Emitted fluorescence was collected through the same objective, passed through an Olympus fluorescence cube (490 nm dichroic, 510–600 nm bandpass barrier filter) and imaged using either a Cascade 128+ or Cascade 650 electron-multiplied c.c.d. camera (Roper Scientific). Photolysis of caged iIP<sub>3</sub> was accomplished by UV (350–400 nm) light from a shuttered mercury arc lamp, either de-

livered uniformly across the imaging field, or restricted to a single cell by a circular field-stop aperture.

**IMMUNOFLUORESCENCE MICROSCOPY:** Cells were washed twice in PBS and fixed in 4% paraformaldehyde for 20 mins at room temperature. The fixed cells were then washed twice in PBS and permeabilized in PBS containing 0.05% Triton X100 and 10% normal goat serum (NGS) for 20 mins at room temperature. Permeabilized cells were then washed in PBS-NGS and incubated overnight with the appropriate antibody (Anti-IP<sub>3</sub>R1, AB5882 at 1:1K, Anti-β-tubulin, T4026 at 1:1K and Alexa fluor 647 phalloidin at 1:1K). The next day, cells were washed three times with PBS and incubated (if needed) with fluorescently conjugated secondary antibodies at 1:1K. Cells were then washed three times prior to analysis.

To visualize TNTs by membrane staining, cells were incubated with the fluorescent lipophilic dye Di-8-ANEPPQ (1 μM). The ER was visualized by transfecting cells with 1μg of a DNA construct encoding ER-GFP 24 hr prior to imaging. Mitochondria were visualized by transfection with a DNA construct for Mito-DsRed-Express.

**MATERIALS:** The membrane permeant caged IP<sub>3</sub> analogue ci-IP<sub>3</sub>/PM (D-2,3-O-Isopropylidene-6-O-(2-nitro-4,5-dimethoxy)benzyl-myo-Inositol 1,4,5-trisphosphate-Hexakis (propionoxymethyl) Ester) was diluted in pluronic F-127 (20% solution in DMSO) to a stock concentration of 200 μM and frozen down into 2 μl aliquots until needed. ci-IP<sub>3</sub>/PM was purchased from SiChem (Bremen, Germany). EGTA-AM, Fluo-4 AM, Di-8-ANEPPQ, Alexa fluor 647 phalloidin ER tracker, pluronic F-127 were from Molecular Probes/Invitrogen (Carlsbad, CA). Anti-IP<sub>3</sub>R1 antibody (AB5882) was purchased from Millipore. All other reagents including Anti-β-Tubulin (T4026) were purchased from Sigma (St. Louis). Mito-DsRed-Express was a kind gift from Joseph Dynes, UCI.

## MODEL SIMULATIONS

**NANOTUBE MODEL:** We modelled a nanotube connecting two cells as a cylindrical tube with a radius of  $r$  and a length of  $L$ . The following species were present

within the cell cytoplasm and the nanotube: free  $\text{Ca}^{2+}$  ions ( $[\text{Ca}^{2+}]$ ), stationary  $\text{Ca}^{2+}$  buffer in free and  $\text{Ca}^{2+}$ -bound ( $[\text{SCa}]$ ) forms, mobile  $\text{Ca}^{2+}$  buffer in free and  $\text{Ca}^{2+}$ -bound ( $[\text{MCA}]$ ) forms, and free  $\text{IP}_3$ . The simple Euler difference method was used to solve the partial differential equations with a time increment  $\Delta t = 2 \mu\text{s}$  and spatial grid distance  $\Delta x = 50 \text{ nm}$

$\text{Ca}^{2+}$  DIFFUSION ALONG THE NANOTUBE: The following parameter values were assumed: Diffusion coefficients for free  $\text{Ca}^{2+}$ , mobile buffer and  $\text{IP}_3$  messenger were  $D_{\text{Ca}} = 200 \mu\text{m}^2/\text{s}$ ,  $D_{\text{MCA}} = 50 \mu\text{m}^2/\text{s}$ ,  $D_{\text{IP}_3} = 280 \mu\text{m}^2/\text{s}$ , respectively; total concentration of stationary  $\text{Ca}^{2+}$  buffer  $S_T = 100 \mu\text{M}$  with calcium binding and unbinding rates  $\alpha_S = 50 \mu\text{M}^{-1}\text{s}^{-1}$  and  $\beta_S = 100 \text{s}^{-1}$ ; the indicator dye buffer was considered the sole mobile  $\text{Ca}^{2+}$  buffer with total concentration  $M_T = 20 \mu\text{M}$  and calcium binding and unbinding rates  $\alpha_M = 150 \mu\text{M}^{-1}\text{s}^{-1}$  and  $\beta_M = 450 \text{s}^{-1}$ .

The diffusion equation for free  $\text{Ca}^{2+}$  ions ( $[\text{Ca}^{2+}]$ ) in the nanotube with diffusion coefficient  $D_{\text{Ca}}$  is described as follows:

$$\frac{\partial[\text{Ca}^{2+}]}{\partial t} = D_{\text{Ca}} \nabla^2[\text{Ca}^{2+}] + \beta_S \times [\text{SCa}] - \alpha_S \times [\text{Ca}^{2+}] \cdot (S_T - [\text{SCa}]) + \beta_M \times [\text{MCA}] - \alpha_M \times [\text{Ca}^{2+}] \cdot (M_T - [\text{MCA}])$$

in which  $\nabla^2$  is the Laplace operator.

For  $\text{Ca}^{2+}$ -bound stationary buffer ( $[\text{SCa}]$ ),

$$\frac{\partial[\text{SCa}]}{\partial t} = \alpha_S \times [\text{Ca}^{2+}] \times (S_T - [\text{SCa}]) - \beta_S \times [\text{SCa}]$$

For  $\text{Ca}^{2+}$ -bound mobile buffer ( $[\text{MCA}]$ ) with diffusion coefficient  $D_{\text{MCA}}$ ,

$$\frac{\partial[\text{MCA}]}{\partial t} = D_{\text{MCA}} \nabla^2[\text{MCA}] + \alpha_M \times [\text{Ca}^{2+}] \times (M_T - [\text{MCA}]) - \beta_M \times [\text{MCA}]$$

Because of the radial symmetry in the TNT,  $\text{Ca}^{2+}$  diffusion is described in one dimension along its length.

The resting concentrations of  $\text{Ca}^{2+}$ -bound stationary buffer and  $\text{Ca}^{2+}$ -bound mobile buffer are given by;

$$S_T / (1 + \beta_S / (\alpha_S \times [\text{Ca}^{2+}]_{\text{Rest}}))$$

and  $M_T / (1 + \beta_M / (\alpha_M \times [\text{Ca}^{2+}]_{\text{Rest}}))$ , respectively.

We consider a case in which the  $\text{Ca}^{2+}$  concentration in the first cell is stepped from 50 nM to 10  $\mu\text{M}$ , simulating a large and sustained  $\text{Ca}^{2+}$  liberation in that cell.  $[\text{Ca}^{2+}]$  in the second cell then increases with time due to the  $\text{Ca}^{2+}$  diffusion through the TNT. In light of the small amounts of  $\text{Ca}^{2+}$  that pass through the TNT, we make a simplifying assumption that  $\text{Ca}^{2+}$  concentrations in each cell are homogeneous throughout the cytosol. The equation for free  $\text{Ca}^{2+}$  concentration in the second cell is then described by;

$$d[\text{Ca}^{2+}]/dt = J_{\text{Ca}}/V + \beta_S \times [\text{SCa}] - \alpha_S \times [\text{Ca}^{2+}] \cdot (S_T - [\text{SCa}]) + \beta_M \times [\text{MCA}] - \alpha_M \times [\text{Ca}^{2+}] \cdot (M_T - [\text{MCA}])$$

with  $V$  the cell volume and  $J_{\text{Ca}}$  the flux of free calcium from the TNT to the second cell which is given by;

$$J_{\text{Ca}} = D_{\text{Ca}} \times S \times \left. \frac{\partial[\text{Ca}^{2+}]}{\partial x} \right|_{\text{TNT Boundary}}$$

with  $S$  the lateral area of TNT. Similar equations apply for  $\text{Ca}^{2+}$ -bound mobile buffer with a flux and for  $\text{Ca}^{2+}$ -bound stationary buffer.

In Fig. S1 we show the resulting  $\text{Ca}^{2+}$  flux (expressed as  $\text{Ca}^{2+}$  current) passing from TNTs of various radii and lengths into the second cell at a time 10s after  $[\text{Ca}^{2+}]$  in the first cell is stepped to 10  $\mu\text{M}$ . For a 'typical' TNT with a length of 30  $\mu\text{m}$  and a diameter of 200 nm the  $\text{Ca}^{2+}$  current after 10s is less than 1 fA; or less than 1% of the  $\text{Ca}^{2+}$  current through a single  $\text{IP}_3\text{R}$  channel. Fig. S1 further shows that the predicted  $\text{Ca}^{2+}$  current from the TNT falls precipitously for TNT lengths over 50  $\mu\text{m}$ . This arises because  $\text{Ca}^{2+}$  diffusion along the TNT is hindered by binding to immobile buffers. In effect, a front of  $\text{Ca}^{2+}$  advances slowly along the TNT as the buffer comes into equilibrium behind it, and a negligible amount of  $\text{Ca}^{2+}$  will exit from the TNT until the front has progressed to the end. Thus, passive propagation of  $\text{Ca}^{2+}$  signals along TNTs would be even less effective than indicated by the above example for longer distances, and at shorter times for shorter TNTs.

$\text{IP}_3$  DIFFUSION ALONG THE NANOTUBE: We also consider the diffusion of  $\text{IP}_3$  along a nanotube from a stimulated cell to a connected, unstimulated cell, described as follows:

$$\frac{\partial[\text{IP}_3]}{\partial t} = D_{\text{IP}_3} \nabla^2[\text{IP}_3]$$

In Fig. S2 we show how  $IP_3$  diffusion would change  $[IP_3]$  within a TNT and within a connected cell following a step increase of  $[IP_3]$  in the first cell. We consider two cells each with a radius of  $5\ \mu\text{m}$ , and assume for simplicity that  $[IP_3]$  is homogeneous throughout the cytosol of both cells. The cells are connected by a TNT of  $50\ \mu\text{m}$  length and we consider radii of 50, 100 and 200 nm, as indicated. The concentration of  $IP_3$  in both cells is initially zero, and is then stepped to a normalized value of 1 in one cell to simulate local photorelease of  $IP_3$ . The flux of  $IP_3$  through the TNT changes  $[IP_3]$  in both cells, as well as in the TNT, as shown in Fig. S2 as functions of time.

The concentration of  $IP_3$  at a distance  $30\ \mu\text{m}$  along the TNT equilibrates within  $\sim 2\text{s}$  to a value about 40% of the initial value in the stimulated cell, suggesting that  $[IP_3]$  would be sufficiently elevated to sustain CICR for an appreciable distance along the TNT. On the other hand, for a 100 nm radius TNT the concentration of  $IP_3$  in the second cell increased to only about 5% of that in the stimulated cell even after 20 s.

The  $iIP_3$  photoreleased in our experiments is metabolized more slowly than native  $IP_3$ , and we did not include a term for  $IP_3$  degradation in our model. However, it is likely that metabolism of native  $IP_3$  would not appreciably affect the ability of TNTs to propagate  $IP_3$ -dependent  $Ca^{2+}$  signals, because the degradation rate of  $\sim 60\ \text{s}$  measured in oocytes (1) is slow in comparison to the timescale ( $\leq 10\text{s}$ ) for  $Ca^{2+}$  signal propagation via TNTs.

1. Sims, C.E. and N.L. Allbritton. 1998. Metabolism of inositol 1,4,5-trisphosphate and inositol 1,3,4,5-tetrakisphosphate by the oocytes of *Xenopus laevis*. *J Biol Chem* 273:4052-4058.

### Supplementary Figures

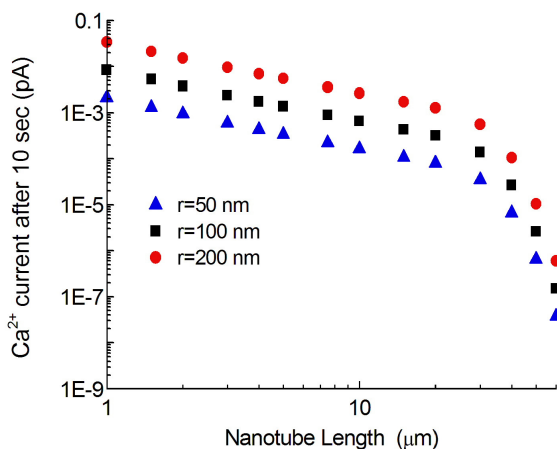

**Figure S1: Passive flux of  $\text{Ca}^{2+}$  along a TNT from a stimulated cell into a connected cell.** The plot shows simulations of two cells connected by a nanotube of varying length (indicated on the ordinate), and with radii of 50, 100 and 200 nm as indicated by different symbols. The  $\text{Ca}^{2+}$  concentration in both cells was initially 50 nM, and the concentration in one cell was then stepped to 10  $\mu\text{M}$ . The data points show the resulting flux of  $\text{Ca}^{2+}$  from the end of the TNT into the second cell after 10s. Flux is expressed on the abscissa in terms of  $\text{Ca}^{2+}$  current: a current of 1pA is equivalent to about  $5 \times 10^{-18}$  moles  $\text{s}^{-1}$  of  $\text{Ca}^{2+}$ . Numerical methods and parameter values were as described in Supporting Methods.

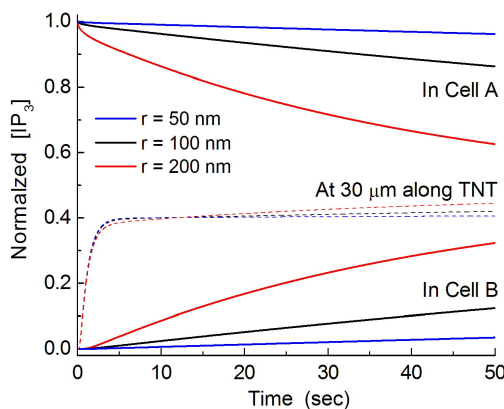

**Figure S2: Passive diffusion of  $\text{IP}_3$  along a TNT.** The plot shows simulations of two cells (A and B), each with a radius of 5  $\mu\text{m}$  connected by a nanotube 50  $\mu\text{m}$  long and with radii of 50, 100 and 200 nm as indicated by different colors. The concentration of  $\text{IP}_3$  in both cells was initially zero, and was then stepped to a normalized value of 1 in Cell A to simulate local photorelease of  $\text{IP}_3$ . The curves show the resulting changes in  $[\text{IP}_3]$  as functions of time after the step in cell A, in cell B, and at a distance of 30  $\mu\text{m}$  along the TNT from cell A.

## Supplementary Movies

**Movie S1:** Movement of mitochondria along TNTs into the cytosol of a neighboring SH-SY5Y cell. SH-SY5Y cells were transfected with 1  $\mu$ g Mito-DsRed-Express and imaged 24 hr later. Time stamp reads in minutes:seconds.

**Movie S2:** Cell-cell communication of  $\text{Ca}^{2+}$  signals along TNTs. Panels show 'raw' fluorescence of fluo-4 (left), and  $\text{Ca}^{2+}$  signals ( $\Delta F/F_0$ ; right) on a pseudocolor scale, with increasing  $[\text{Ca}^{2+}]$  corresponding to warmer colors. One cell was stimulated after 4 s by local photorelease of  $\text{iIP}_3$  from a UV light spot focused as indicated by the circle in the first frame. The evoked rise in  $\text{Ca}^{2+}$  was then transmitted along a TNT to induce a rise in  $\text{Ca}^{2+}$  in a neighboring cell (below), which then further propagated to a third cell (upper left). Time stamp reads in minutes:seconds.

**Movie S3:** Example of cell-cell communication along a TNTs that evoked puffs, but not a global  $\text{Ca}^{2+}$  response in connected cells. Movie shows pseudocolored  $\text{Ca}^{2+}$  signals ( $\Delta F/F_0$ ; right pane) evoked following local photorelease of  $\text{iIP}_3$  by a UV light spot focused as indicated by the circle in the first frame. Puff activity was then stimulated in two adjacent cells connected via TNTs, and within the TNTs themselves. Time stamp reads in minutes:seconds.

**Movie S4:** Active propagation of  $\text{Ca}^{2+}$  signals along a TNT which failed to evoke a response in the connected cell. Panels show 'raw' fluorescence of fluo-4 (left), and  $\text{Ca}^{2+}$  signals ( $\Delta F/F_0$ ; right) on a pseudocolor scale, with increasing  $[\text{Ca}^{2+}]$  corresponding to warmer colors. The uppermost cell was stimulated by a UV light spot focused on the soma to evoke a strong  $\text{Ca}^{2+}$  signal. Discrete localized  $\text{Ca}^{2+}$  events transmitted the rise in  $\text{Ca}^{2+}$  along the TNT, but failed to induce an appreciable rise in  $\text{Ca}^{2+}$  in the connected cell. This lack of communication was not due to the TNT being closed-ended as subsequent stimulation of the lower cell induced a passive flux of  $\text{Ca}^{2+}$  that diffused several microns into the TNT (not shown). Time stamp reads in minutes:seconds.
